# Supplementary material for: Selenenyl iodide: a new substrate for mammalian thioredoxin reductaseElectronic supplementary information (ESI) available: additional data. See http://www.rsc.org/suppdata/ob/b3/b302220j/
Source: Royal Society of Chemistry journal article supplement (doi:10.1039/b302220j), 2003-01-01
Supplement: b302220j.pdf [file b302220j.pdf]

# Supporting Information

S 1. Means of the three experiments (data are n=3, except for open square: n=1; concentrations of **1** used were between 4.9 and 49  $\mu\text{M}$ ). The concentration of the enzyme (HP-TrxR) was 460 nM

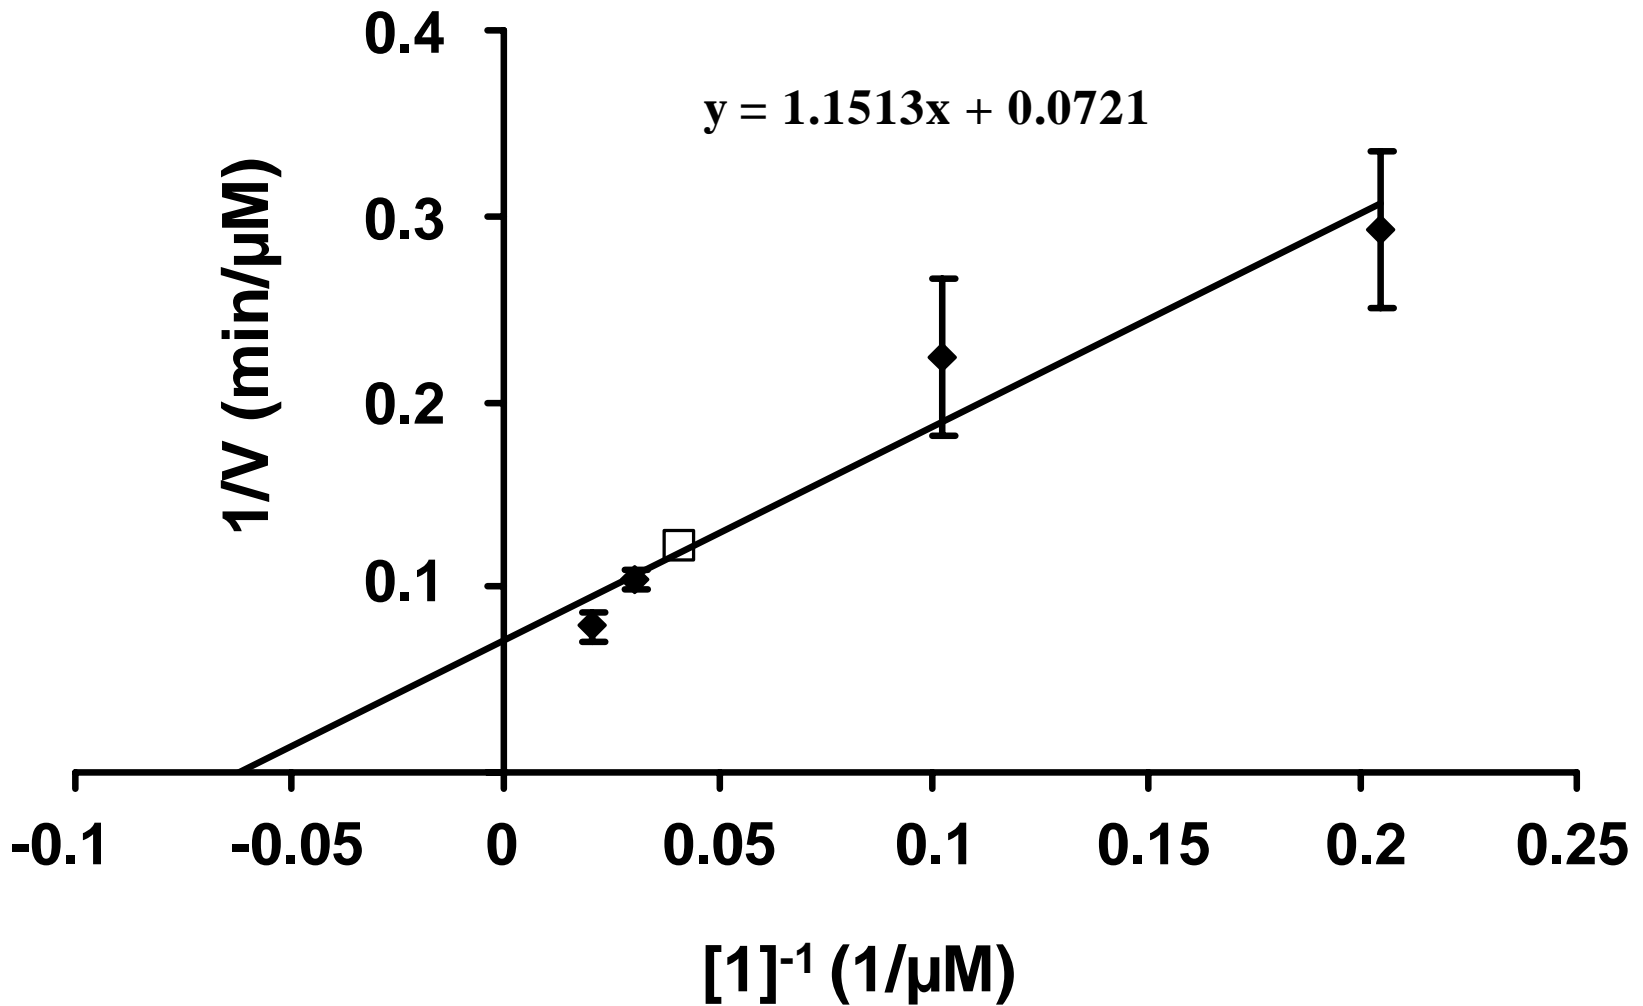

S 2. One of the three experiments shown in S 1.

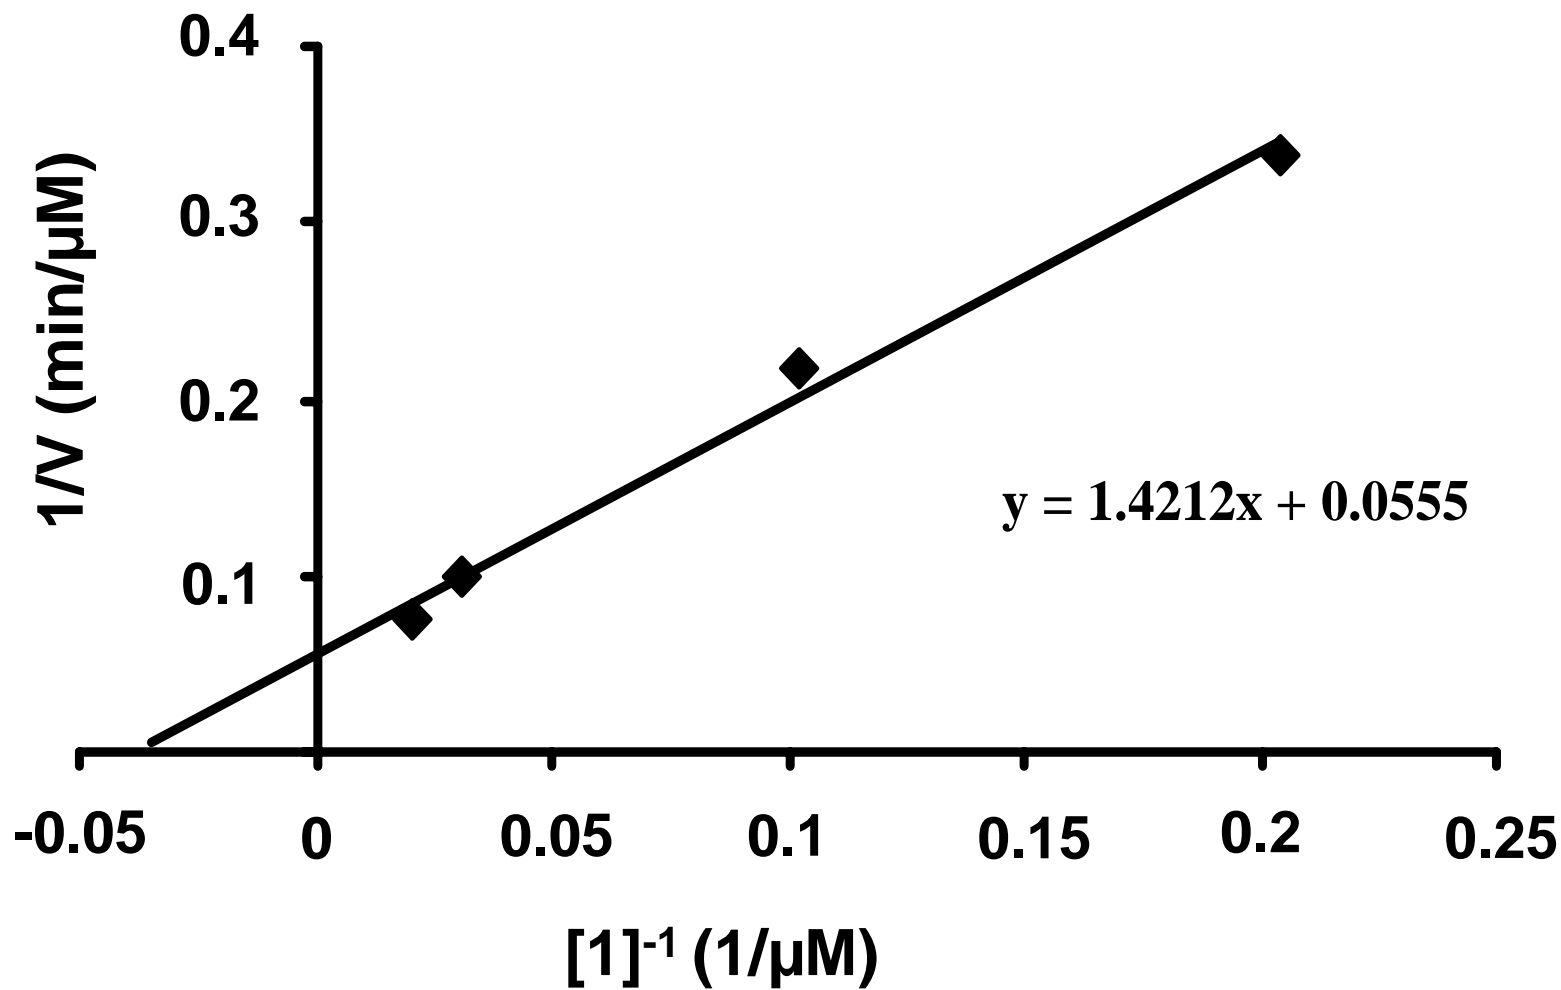

Calculation according to S 1

( $K_m$  and  $V_{max}$  from means of all single data points)

|  |                                        |           |
|--|----------------------------------------|-----------|
|  | $K_m/V_{max}$                          | 1,1513    |
|  | $1/V_{max}$ (at $x=0$ )                | 0,0721    |
|  | $(-)\frac{1}{K_m}$ (at $y=0$ )         | -0,062625 |
|  |                                        |           |
|  | $K_m$ ( $\mu\text{M}$ )                | 15,97     |
|  | $V_{max}$ ( $\mu\text{M}/\text{min}$ ) | 13,87     |

Calculation according to S 2: (Reported in the main text)

(means of all single Km and Vmax values:)

| <b>Km (<math>\mu\text{M}</math>)</b>              | <b>means</b> | <b>SD</b> |
|---------------------------------------------------|--------------|-----------|
| 13,82                                             | 17,52        | 5,72      |
| 13,14                                             |              |           |
| 25,61                                             |              |           |
|                                                   |              |           |
| <b>Vmax (<math>\mu\text{M}/\text{min}</math>)</b> | <b>means</b> | <b>SD</b> |
| 14,58                                             | 14,78        | 2,57      |
| 11,73                                             |              |           |
| 18,02                                             |              |           |
